# Supplementary material for: Chronotype and environmental light exposure in a student population
Source: PubMed Central journal article supplement (PMC6234547; doi:10.1080/07420528.2018.1482556), 2018-06-18
Supplement: ICBI_A_1482556_SM6531.pdf [file ICBI_A_1482556_SM6531.pdf]

### Supplementary materials

Linear mixed-effects model fitting with lme package with R version 3.0.1. All models are levelled against Oxford and, where applicable, females and spring.

#### Model 1: City/season interaction for MSFsc covarying for age and sex

|                  | Value     | Standard error | df   | t-value   | p-value |
|------------------|-----------|----------------|------|-----------|---------|
| Groningen        | 0.029602  | 0.10993814     | 6420 | 0.389709  | 0.6968  |
| Munich           | -0.713844 | 0.11259734     | 6420 | 0.262900  | 0.7926  |
| Perth            | -0.432622 | 0.12883189     | 6420 | -5.540898 | 0.0000  |
| Melbourne        | -0.725011 | 0.22757196     | 6420 | -1.901034 | 0.0573  |
| Auckland         | -0.073771 | 0.16146449     | 6420 | -4.490223 | 0.0000  |
| Season           | -0.052164 | 0.14345121     | 6420 | -0.514257 | 0.6071  |
| Age              | 0.653705  | 0.00771388     | 6420 | -6.762391 | 0.0000  |
| Sex              | 0.121189  | 0.03332279     | 6420 | 19.617365 | 0.0000  |
| Groningen:Season | -0.043641 | 0.15037687     | 6420 | 0.805900  | 0.4203  |
| Munich:Season    | 0.414374  | 0.15437806     | 6420 | -0.282688 | 0.7774  |
| Perth:Season     | 0.196925  | 0.24246922     | 6420 | 1.708976  | 0.0875  |
| Melbourne:Season | 0.078087  | 0.25679926     | 6420 | 0.766844  | 0.4432  |
| Auckland:Season  | 0.029602  | 0.19952868     | 6420 | 0.391358  | 0.6955  |

#### Model 2: City main effect for MSFsc, covarying for age and sex

|           | Value     | Standard error | df   | t-value  | p-value |
|-----------|-----------|----------------|------|----------|---------|
| Groningen | 0.105897  | 0.07520592     | 6426 | 1.40810  | 0.1592  |
| Munich    | 0.015766  | 0.07804303     | 6426 | 0.20202  | 0.8399  |
| Perth     | -0.626986 | 0.09956148     | 6426 | -6.29748 | 0.0000  |
| Melbourne | -0.282392 | 0.09693362     | 6426 | -2.91326 | 0.0036  |
| Auckland  | -0.681775 | 0.09263664     | 6426 | -7.35967 | 0.0000  |
| Age       | -0.051959 | 0.00769087     | 6426 | -6.75591 | 0.0000  |
| Sex       | 0.654364  | 0.03332293     | 6426 | 19.63706 | 0.0000  |

#### Model 3: City main effect of time spent outside

|           | Value      | Standard error | df   | t-value   | p-value |
|-----------|------------|----------------|------|-----------|---------|
| Groningen | 0.2334311  | 0.08011872     | 6224 | 2.913565  | 0.0036  |
| Munich    | 0.2844144  | 0.08214180     | 6224 | 3.462480  | 0.0005  |
| Perth     | 0.8123195  | 0.10496695     | 6224 | 7.738812  | 0.0000  |
| Melbourne | -0.0610385 | 0.10369715     | 6224 | -0.588623 | 0.5561  |
| Auckland  | 0.2336802  | 0.09857029     | 6224 | 2.370697  | 0.0178  |

**Model 4: City main effect of light dose**

|           | Value    | Standard error | df   | t-value   | p-value |
|-----------|----------|----------------|------|-----------|---------|
| Groningen | 3.83332  | 1.086134       | 6224 | 3.529326  | 0.0004  |
| Munich    | 1.68083  | 1.113560       | 6224 | 1.509421  | 0.1312  |
| Perth     | 43.24676 | 1.422991       | 6224 | 30.391460 | 0.0000  |
| Melbourne | 6.72240  | 1.405776       | 6224 | 4.781984  | 0.0000  |
| Auckland  | 4.13231  | 1.336274       | 6224 | 3.092416  | 0.0020  |

**Model 5: City, light dose and time spent outside main effects of MSFsc, covarying for age and sex.**

|                    | Value     | Standard error | df   | t-value  | p-value |
|--------------------|-----------|----------------|------|----------|---------|
| Groningen          | 0.100894  | 0.07551231     | 6213 | 1.33613  | 0.1816  |
| Munich             | 0.013837  | 0.07839135     | 6213 | 0.17652  | 0.8599  |
| Perth              | -0.558185 | 0.11545646     | 6213 | -4.83459 | 0.0000  |
| Melbourne          | -0.301662 | 0.09855992     | 6213 | -3.06069 | 0.0022  |
| Auckland           | -0.677443 | 0.09315072     | 6213 | -7.27255 | 0.0000  |
| Age                | -0.049472 | 0.00779893     | 6213 | -6.34338 | 0.0000  |
| Sex                | 0.645503  | 0.03374920     | 6213 | 19.12647 | 0.0000  |
| Light dose         | -0.002092 | 0.00168160     | 6213 | -1.24410 | 0.2135  |
| Time spent outside | 0.047750  | 0.02282116     | 6213 | 2.09236  | 0.0364  |

**Model 6: City and time spent outside interaction of MSFsc, covarying for age and sex**

|                              | Value     | Standard error | df   | t-value   | p-value |
|------------------------------|-----------|----------------|------|-----------|---------|
| Groningen                    | -0.022591 | 0.15088398     | 6209 | -0.149725 | 0.8810  |
| Munich                       | -0.039096 | 0.15578814     | 6209 | -0.250954 | 0.8019  |
| Perth                        | -0.588174 | 0.19523150     | 6209 | -3.012700 | 0.0026  |
| Melbourne                    | -0.503604 | 0.17937919     | 6209 | -2.807485 | 0.0050  |
| Auckland                     | -0.769867 | 0.17929166     | 6209 | -4.293935 | 0.0000  |
| Time spent outside           | -0.022882 | 0.06409468     | 6209 | -0.357007 | 0.7211  |
| Age                          | -0.049293 | 0.00780214     | 6209 | -6.317886 | 0.0000  |
| Sex                          | 0.644257  | 0.03378808     | 6209 | 19.067591 | 0.0000  |
| Groningen:Time spent outside | 0.060398  | 0.06649035     | 6209 | 0.908370  | 0.3637  |
| Munich:Time spent outside    | 0.030927  | 0.06806064     | 6209 | 0.454400  | 0.6496  |
| Perth:Time spent outside     | -0.001014 | 0.07588791     | 6209 | -0.013359 | 0.9893  |
| Melbourne:Time spent outside | 0.097147  | 0.07802323     | 6209 | 1.245106  | 0.2131  |
| Auckland:Time spent outside  | 0.045983  | 0.07601675     | 6209 | 0.604910  | 0.5453  |
